# Supplementary material for: Electrochemical performance of Cu6Sn5 alloy anode materials for lithium-ion batteries fabricated by controlled electrodeposition
Source: Royal Society of Chemistry journal article supplement (doi:10.1039/d4ra04562a), 2024-01-01
Supplement: d4ra04562a1.pdf [file d4ra04562a1.pdf]

## Supplementary Materials

### *Electrochemical performance of $\text{Cu}_6\text{Sn}_5$ alloy anode materials for lithium-ion batteries fabricated by controlled electrodeposition*

Minyue Wen<sup>1</sup>, Jiafu Yu<sup>1</sup>, Jiawen Wang<sup>1</sup>, Shuaihao Li<sup>1</sup>, Qiuyu Zeng<sup>2\*</sup>

<sup>1</sup> College of Chemistry and Environmental Engineering, Yangtze University, Jingzhou, 434023, P. R. China

<sup>2</sup> School of Material Science and Engineering, Anhui University of Science and Technology, Huainan 232000, China

\* Corresponding author: Qiuyu Zeng, Anhui University of Science and Technology, Email: [qiuyuzeng@foxmail.com](mailto:qiuyuzeng@foxmail.com).

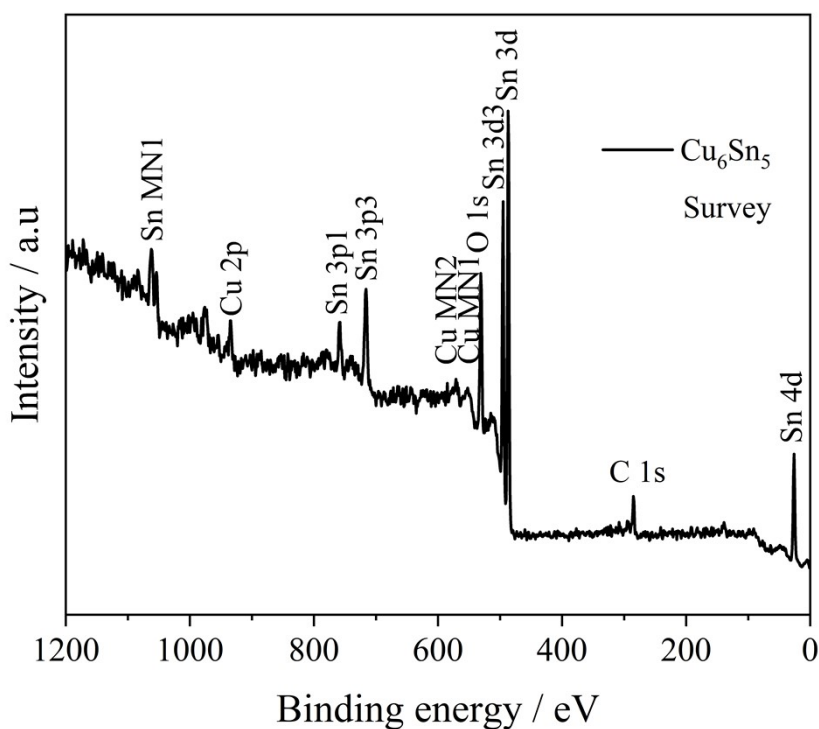

**Fig. S1** XPS survey spectra of the S2 sample

\* Corresponding author, Tel.: +86 15313251023,

E-mail address: [qiuyuzeng@foxmail.com](mailto:qiuyuzeng@foxmail.com).

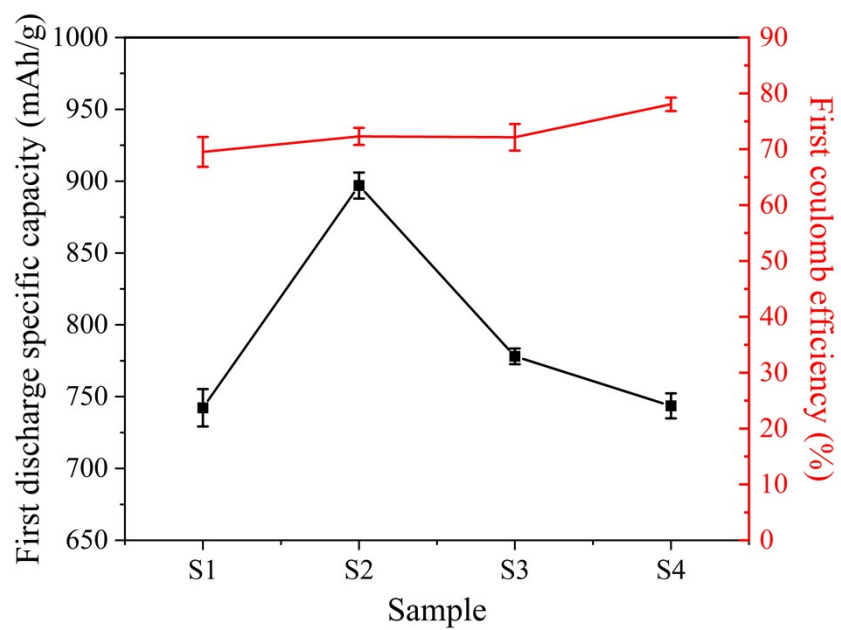

**Fig. S2** Error bars for the first discharge specific capacity and the first cycle efficiency of the S1, S2, S3, and S4 samples
